# Supplementary material for: Unusual course of disease and genetic profile in Li-Fraumeni syndrome-associated osteosarcoma – a case report
Source: Hered Cancer Clin Pract. 2021 Oct 20;19:44. doi: 10.1186/s13053-021-00202-0 (PMC8527636; doi:10.1186/s13053-021-00202-0)
Supplement: Supplementary file 2 — Additional file 2. Detailed list of potentially relevant genes affected by different CNA profile. List of potentially affected genes due to CNA and potentially affected genes due to differences to previously reported CNA. Validated (candidate) oncogenes in OS according to Rickel et al. (2017) were depicted in fat letters. [file 13053_2021_202_MOESM2_ESM.xls]

## Sheet: Table 2
chromosomal region	CNA	gene	function
1p32.1	no gain	JUN	proliferation, anti-apoptosis, transformation
1p32.3	no gain	RNF11	TGF-beta signalling, inflammation
1p33	no gain	CYP4B1	angiogenesis
1p33	no gain	PDZK1IP1	ROS-mediated anti-apoptosis
1p33	no gain	STIL	proliferation
1p34.1	no gain	MUTYH	oxidative DNA damage repair
1p34.1	no gain	PRDX1	antioxidant
1p34.1	no gain	TSPAN1	transmembrane protein, activation, growth, motility
1p34.2	no gain	TIE1	angiogenesis
1p34.2	no gain	CDC20	spindle assembly checkpoint
1p34.2	no gain	YBX1	splicing, transcription, translation, chromatine remodelling, DNA repair
1p34.3	no gain	CLSPN	S-phase checkpoint regulator
1p35.1-p35.2	no gain	HDAC1	epigenetic alterations, TP53 regulation, proliferation
1p35.2	no gain	COL16A1	adhesion, invasion, morphogenesis
1p35.3	no gain	PPP1R8	splicing, transciptional repressor
1p35.3	no gain	RPA2	DNA binding protein, DNA replication + repair
1p36.11	loss	ARID1A	DNA binding protein, tumor suppressor
1p36.11	loss	CLIC4	TGF-beta signaling, angiogenesis, apoptosis
1p36.11	loss	RPS6KA1	Ras/EKR effector, growth, proliferation
1p36.11	loss	STMN1	microtubuli organization
1p36.12	loss	CDC42	Ras GTPase, intracellular trafficking, cell cycle regulation, migration, transcriptional control
1p36.12	loss	HSPG2	growth factor signaling, differentiation, angiogenesis, bone development
1p36.13	loss	EPHA2	transmembrane protein, tyrosine kinase
1p36.13	loss	PLA2G2A	inflammatory processes, anti-tumour effects
1p36.21	no gain	PRDM2	DNA + transcription factor binding
1p36.21	no gain	CASP9	apoptosis, resistance to therapy
1p36.22	no gain	CASZ1	differentiation, inhibition of migration
1p36.22	no gain	MTOR	central cellular pathway
1p36.22	no gain	PIK3CD	AKT signaling, proliferation, migration
1p36.23	no gain	ENO1	MBP-1 as tumor suppressor
1p36.23	no gain	ERRFI1	tumor suppressor gene
1p36.23	no gain	PARK7	transcriptional regulation, antioxidative stress
1p36.31	no gain	CAMTA1	transcriptional activator
1p36.31	no gain	CHD5	chromatin remodelling
1p36.33	no gain	MIR200A	tumor cell proliferation + invasion
1p36.33	no gain	MIR200B	tumor cell proliferation + invasion
1p36.33	no gain	MIR429	tumor cell proliferation + invasion
1q21.1	no gain	PIAS3	STAT3 inhibitor, trancriptional repression
1q21.3	no gain	SLC39A1	induction of apoptosis
1q21.3	no gain	SHC1	carcinogenesis, proliferation via RAS/growth factor signaling
1q21.3	no gain	S100A9	tumor development, invasion, metastasis
1q21.3	no gain	S100A8	tumor development, invasion, metastasis
1q21.3	no gain	S100A7	tumor progression, chemotaxis
1q21.3	no gain	S100A4	transcriptional regulation, cell cycle, proliferation, tumor growth, apoptosis, invasion, motility
1q21.3	no gain	S100A2	tumor supressor or tumorigenesis and metastasis
1q21.3	no gain	S100A13	exocytosis, angiogenesis
1q21.3	no gain	S100A1	chondrocyte differentiation, proliferation
1q21.3	no gain	S100A10	plasmin regulation, invasion
1q21.3	no gain	RPS27	component of ribosomal subunit, proliferation, oncogenesis via stabilization of p53
1q21.3	no gain	PYGO2	chromatin remodelling
1q21.3	no gain	PRUNE1	migration, invasion
1q21.3	no gain	PIP5K1A	invasion
1q21.3	no gain	CKS1B	cell cycle control
1q21.3	no gain	ECM1	bone formation, angiogenesis, metastasis
1q23.2	gain	IGSF8	inhibition of migration, regulation of proliferation
1q23.2	gain	PEA15	binding molecule in apoptosis, inhibition of invasion and ERK
2p24.1	loss	SDC1	proliferation, migration, signaling, cell-cell interactions
2p24.1	loss	RHOB	negative modifier of adhesion + growth factor signaling
2p24.3	loss	MYCN	transcription factor, proto-oncogene
2p24.3	loss	DDX1	translation, migration
3p11.1	gain	EPHA3	cytoskeleton organization, cellular migration, adhesion
3p12.3	gain	ROBO1	cellular migration, angiogenesis
3p13	gain	FOXP1	transcriptional repressor, possible tumor suppressor gene
3p14.1	gain	ADAMTS9	cell migration, inhibition of angiogenesis, intracellular transport
3p14.1	gain	LRIG1	suppressor of tyrosin kinase, possible tumor suppressor gene
3p14.2	gain	FHIT	tumor suppressor
3p14.2	gain	PTPRG	possible tumor suppressor gene, antagonizing of tyrosine kinases
3p14.3	gain	WNT5A	promotion of invasion/metastasis vs. suppression of carcinogenesis
3p14.3	gain	FAM107A	possible tumor suppressor gene
3p21.1	gain	BAP1	enhancer of BRCA1-mediated tumor suppressor functions
3p21.1	gain	PBRM1	regulation of gene expression via chromatine remodelling, possible tumor suppressor gene
3p21.1	gain	PRKCD	apoptosis, hoemostasis, transcriptional regulation
3p21.2	gain	MIR135A1	tumor suppressor vs. oncogene
3p21.31	gain	CCR1	invasiveness, metastasis
3p21.31	gain	CCR2	angiogenesis, metastasis
3p21.31	gain	CCR9	metastasis
3p21.31	gain	CDC25A	inhibitor of apoptosis, mitosis, oncogene
3p21.31	gain	CDCP1	inhibit cell adhesion, migration
3p21.31	gain	GPX1	protection from ROS
3p21.31	gain	HYAL1	possible tumor suppressor gene
3p21.31	gain	LIMD1	inhibition of E2F-mediated transcription + cell proliferation
3p21.31	gain	MIR191	targeting CDK6
3p21.31	gain	MST1	proliferation, migration, invasion
3p21.31	gain	PFKFB4	control of glycolysis
3p21.31	gain	PLXNB1	intracellular signal transduction, motility, invasion, adhesion
3p21.31	gain	RASSF1	apoptosis effects via Ras, tumor suppressor
3p21.31	gain	RBM5	apoptosis, cell cycle regulation, possible tumor suppressor gene
3p21.31	gain	RHOA	proliferation, migration, anti-apoptosis in OS
3p21.31	gain	SEMA3B	apoptosis induction, possible tumor suppressor
3p21.31	gain	SEMA3F	tumor suppressor, anti-neoangiogenesis
3p21.31	gain	ZMYND10	possible tumor suppressor gene
3p22.2	gain	CTDSPL	regulation of growth and differentiation, transcriptional corepressor
3p22.2	gain	ITGA9	adhesion, cell-cell-interaction
3p22.2	gain	MIR26A1	apoptosis, inhibition of tumorigenesis, differentiation
3p22.2	gain	PLCD1	tumor suppressor gene
3p24.1	gain	TGFBR2	tumor suppressor gene
3p24.2	gain	THRB	possible tumor suppressor
3p24.3	gain	SGO1	centromeric cohesion, genomic stability
3p25.1	gain	FBLN2	assemby of elastic fiber, extracellular interaction, possible tumor suppressor
3p25.1	gain	PPARG	differentiation, anti-proliferative
3p25.2	gain	RAF1	oncogene, MAPK/ERK signalling pathway, tumorigenesis, promotion of survival
3q13.11	no loss	ALCAM	invasion, migration
3q13.2	no loss	CD200	key immunosuppressive molecule
3q13.33	no loss	GSK3B	cell cycle control, proliferation
3q23	loss	FAIM	apoptosis regulation
4p16.3	loss	NSD2	histone methylation, cellular response to DNA damage
4p16.3	loss	TACC3	transcriptional regulation, mitosis, p53-mediated apoptosis
5p13.1	no gain	DAB2	signaling, adhesion, angiogenesis
5p13.2	no gain	IL7R	JAK/STAT signaling
5p13.3	no gain	ADAMTS12	tumor suppressor gene
5p13.33	no gain	PDCD6	proapoptotic protein
5p15.2	no gain	TRIO	proto-oncogene
8q12.1	no gain	PLAG1	chromosome rearrangement
8q12.1	no gain	SDCBP	invasion
8q13.2	no gain	SULF1	sulfatase activity
9p13.2	no loss	MELK	cell transformation
9p13.3	no loss	BAG1	regulation of apoptosis, proliferation, transcription, motility
9p13.3	no loss	STOML2	invasion, metastasis, regulation of cytoskeleton
9p13.3	no loss	VCP	metastasis, tumour progression
9q33.1	loss	TNC	invasion, adhesion
10q22.1	no loss	AIFM2	TP53-dependent apoptotic response
10q22.1	no loss	DDIT4	negative mTOR-regulator, tumor suppressor
10q23.2	no loss	SNCG	proliferation, metastasis
10q23.31	no loss	FAS	apoptosis
10q23.31	no loss	KLLN	target of p53, cell cycle arrest
10q23.31	no loss	MIR107	tumor suppressor gene (hypoxia response, angiogenesis)
10q23.31	no loss	PTEN	negative AKT regulator, anti-proliferative
10q23.33	no loss	HELLS	chromatin remodelling, DNA repair
10q25.2	no loss	MXI1	tumor suppressor gene
10q25.2	no loss	PDCD4	inhibition of AP-1-dependent transcription, tumor suppressor gene
10q25.3	no loss	AFAP1L2	tumor progression (proliferation, motility, invasion)
10q25.3	no loss	CASP7	apoptosis
10q26.11	no loss	BAG3	regulation of apoptosis
10q26.11	no loss	EIF3A	translation, differentiation, cell cycle regulation, oncogenesis
10q26.13	no loss	FGFR2	MAPK, AKT, PKC signaling
10q26.13	no loss	TACC2	microtubli function, chromatin remodelling, DNA repair
10q26.13	no loss	HTRA1	TGF-beta signaling, apoptosis
10q26.13	no loss	DMBT1	differentiation, anti-inflammatory
10q26.13-q26.3	no loss	DOCK1	regulation of cytoskeleton
10q26.2	no loss	ADAM12	catalytic protein, proliferation
10q26.2	no loss	MKI67	prognostic factor, cell cycle regulation
11q14.1	no gain	GAB2	receptor signal amplifier
11q14.2	no gain	RSF1	transcriptional co-activator, chromatin remodelling
14q24.1	no gain	ZFP36L1	pro-apoptotic protein, RNA binding
14q24.2	no gain	NUMB	signaling, endocytosis, ubiquitination, protection of p53
14q24.3	no gain	SNW1	transcriptional co-activator
14q31.1	no gain	DIO2	alteration of activity in tumors, OS diminished activity
14q31.1	no gain	SEL1L	protein degradation, tumor progression
14q32.11	no gain	GPR68	osteoclastogenesis, tumor metastasis suppressor
14q32.12	no gain	FBLN5	elastic fiber assembly, invasion, metastasis
14q32.12	no gain	MOAP1	pro-apoptotic protein
14q32.2	no gain	MEG3	inhibition of proliferation, p53-activation
14q32.2	no gain	VRK1	proliferation
14q32.33	no gain	MTA1	interaction with histone deacetylase, invasion, metastasis
14q32.33	no gain	SIVA1	pro-apoptotic functions, inhibition of migration and metastasis in OS
14q32.33	no gain	AKT1	apoptosis inhibition, proliferation, angiogenesis, translation, alteration of suppressors
17q21.2	no gain	ACLY	membrane protein, transcriptional activity, metastasis
17q21.2	no gain	CDC6	chromatin binding, DNA replication, genomic stability
17q21.2	no gain	STAT3	transcriptional activation
17q21.2	no gain	STAT5b	transcription factor, proliferation, differentiation, survival
17q21.2	no gain	TNS4	migration, invasion
17q21.31	no gain	ETV4	oncogenic transcription factor
17q21.31	no gain	GRN	proliferation, migration, survival
17q21.31	no gain	BRCA1	DNA repair, transcriptional regulation, cell cycle regulation, p53-interaction
17q21.31	no gain	NMT1	myristoylation of oncogenic proteins during tumorigenesis
17q21.32	no gain	IGF2BP1	RNA stabilization, metastasis
17q21.32	no gain	KPNB1	genomic instability, shuttling
17q21.33	no gain	PPP1R9B	membrane protein, cytoskeleton
17q21.33	no gain	NME1	metastasis
17q21.33	no gain	DLX4	Bcl-2 interaction, anti-apoptotic function
17q22	no gain	SRSF1	RNA splicing, proto-oncogene
17q23.1	no gain	MIR21	anti-apoptotic factor
17q23.3	no gain	PRM1D	phosphatase, proto-oncogene
17q24	no gain	AXIN2	tumor suppressor gene
17q25.1	no gain	GRB2	receptor signaling, motility, cell cycle control
17q25.1	no gain	SLC9A3R1	adaptor protein for transformation
17q25.3	no gain	SOCS3	tumor suppressor gene, negative regulator of JAK/STAT
17q25.3	no gain	TIMP2	inhibition of angiogenesis, MMP regulator
17q25.3	no gain	RAC3	cytoskeleton, cell cycle control, ROS production
18q21.1	no loss	SMAD2	differentiation, growth, TGF-beta signaling, tumor suppressor gene
18q21.1-q21.2	no loss	MAPK4	unclear, loss in multiple cancers
18q21.2	no loss	DCC	adhesion molecule, apoptosis
18q21.2	no loss	SMAD4	differentiation, growth, TGF-beta signaling, tumor suppressor gene
18q21.31	no loss	MIR122	tumor suppressor, stabilizes p53
18q21.33	no loss	PHLPP1	AKT interaction, suppression of proliferation
18q21.33	no loss	SERPINB3	anti-apoptotic function, invasion
18q21.33	no loss	SERPINB5	tumor suppressor gene, angiogenesis, invasion, metastasis
18q21.33	no loss	BCL2	anti-apoptotic function
18q22.2	no loss	SOCS6	signaling, protein metabolism
19q13.11	loss	CEPBA	cell cycle arrest, differentiation
19q13.11	loss	PDCD5	apoptosis, inhibition of transformation
19q13.12	loss	FXYD3	ion transport
19q13.12	loss	FXYD5	invasion, metastasis
19q13.2	loss	ACTN4	candidate oncogene (cell adhesion, motility, apoptosis)
19q13.2	loss	AKT2	tumorigenesis, angiogenesis, cell cycle progression, survival, growth, invasion
19q13.2	loss	AXL	survival, proliferation, apoptosis inhibition, migration, cell adhesion, cytokine production
19q13.2	loss	CEACAM1	possible tumor suppressor, role in carcinogenesis unclear
19q13.2	loss	CEACAM5	tumor marker
19q13.2	loss	CIC	transcriptional repressor, oncogenesis
19q13.2	loss	CXCL17	angiogenesis, immune cell migration
19q13.2	loss	PAF1	oncogenesis, growth
19q13.2	loss	TGFB1	invasion, angiogenesis, metastasis, inhibition of immune surveillance
19q13.31	loss	CADM4	cell-cell-adhesion
19q13.31	loss	LYPD3	cell-cell-adhesion/interaction, invasion, metastasis
19q13.31	loss	PLAUR	plasminogen activation, invasion, metastasis
19q13.32	loss	BBC3	mediation of apoptosis
19q13.32	loss	MARK4	Wnt signalling pathway, carcinogenesis
19q13.32	loss	RELB	cell-cell-interaction/communication, migration, apoptosis, tumorigenesis
19q13.32	loss	SLC1A5	gutamine membrane transporter
19q13.33	loss	AKT1S1	nuclear stress response, proteasome activity, survival
19q13.33	loss	ATF5	transcription factor
19q13.33	loss	BAX	pro-apoptotic function
19q13.33	loss	BCL2L12	mediation of apoptosis
19q13.33	loss	CARD8	anti-apoptotic function
19q13.33	loss	EMP	differentiation, growth
19q13.33	loss	MIR150	growth vs. tumor suppressor via apoptosis
19q13.33	loss	RUVBL2	modulation of transcriptional regulation, interaction with c-myc
20p11.22	loss	NKX2-2	transcription factor
20p12.3	loss	PCNA	DNA replication + repair, cell cycle control
20p12.3	loss	PLCB1	signaling, cell cycle control
20q11.21	loss	BCL2L1	anti-apoptotic function
20q11.21	loss	DNMT3B	chromatin remodelling, methylation
20q11.21	loss	ID1	DNA binding protein, control of gene expression
20q11.21	loss	PLAGL2	activation of IGF-II pathway
20q11.21	loss	TPX2	spindle apparatus, DNA repair
20q11.22	loss	E2F1	transcription factor, apoptosis, DNA repair
20q11.23	loss	BLCAP	transmembrane protein, overexpression in OS
20q11.23	loss	SRC	proto-oncogene
20q11.23	loss	TGM2	resistance to chemotherapy
20q12	loss	CHD6	chromatin remodelling, suppression of gene expression
20q12	loss	PLCG1	proliferation, angiogenese, metastasis
20q13.12	loss	EYA2	transcriptional co-activator, oncogenesis
20q13.12	loss	MMP9	invasiveness, metastasis
20q13.12	loss	MYBL9	transcription factor
20q13.12	loss	UBE2C	cell cycle progression G2/M-phase
20q13.13	loss	CSE1C	protein transport, apoptose, invasion
20q13.13	loss	SNAI1	transcription factor
20q13.2	loss	AURKA	kinase, cell division
20q13.32	loss	MIR296	metastasis
20q13.33	loss	TNFRSF6B	anti-apoptotic function, eversion from immune system
21q11.2	gain	NRIP1	hormone dependant cancer, cell growth, apoptosis
21q21.1	gain	MIR125B2	tumor supressor gene, osteoblast differentiation
21q21.3	gain	ADAMTS1	metastasis, angiogenesis inhibitor
21q22.11	gain	TIAM1	migration, invasion
21q22.13	gain	DYRK1A	reduction of calcineurin signaling + angiogenesis + tumor growth, anti-apoptosis
21q22.2	gain	ERG	regulator of proliferation, differentiation, angiogenesis, apoptosis
21q22.2	gain	ETS2	transformation, regulatur of gene expression for metastasis, angiogenesis, apoptosis
21q22.3	gain	CSTB	protease inactivation, tumorsuppressor
21q22.3	gain	S100B	inhibition of microtubule assembly, cell cycle progression, differentiation
21q22.3	gain	TMPRSS3	serin protease
22q11.23	loss	MIF	angiogenesis, cell cycle progression, inhibiting apoptosis
22q11.23	loss	MMP11	invasion, aggressiveness
22q11.23	loss	SMARCB1	transcriptional activation, chromatin remodelling
Xp11.3	no gain	MIR222	bone formation, migration, differentiation
Xp11.3	no gain	MIR221	angiogenesis
Xp11.22	no gain	SSX2	chromatin remodelling, CT antigen
Xp11.21	no gain	TRO	overexpression in cancer
Xp21.2	no gain	NR0B1	growth, cell cycle control, transcriptional regulation
